## Engineering yeast for *de-novo* synthesis of the insect repellent - nepetalactone

Meghan E Davies<sup>a,b</sup>, Daniel Tsyplenkov<sup>a,b</sup> and Vincent J. J. Martin<sup>a,b\*</sup>

<sup>a</sup> Department of Biology, Concordia University, Montréal, Québec, Canada

<sup>b</sup> Centre for Applied Synthetic Biology, Concordia University, Montréal, Québec, Canada

\*Corresponding author: [vincent.martin@concordia.ca](mailto:vincent.martin@concordia.ca)

Nepetalactone, monoterpene, *Saccharomyces cerevisiae*, cytochrome P450, 8-hydroxygeraniol

## ABSTRACT

While nepetalactone, the active ingredient in catnip, is a potent insect repellent, its low *in planta* accumulation limits its commercial viability as an alternative repellent. Here we describe a platform for *de novo* nepetalactone production in *Saccharomyces cerevisiae*, enabling sustainable and scalable production. Nepetalactone production required introduction of eight exogenous genes including the cytochrome P450 geraniol-8-hydroxylase, which represented the bottleneck of the heterologous pathway. Combinatorial assessment of geraniol-8-hydroxylase and cytochrome P450 reductase variants, as well as copy-number variations were used to overcome this bottleneck. We found that several reductases improved hydroxylation activity, with a higher geraniol-8-hydroxylase ratio further increasing 8-hydroxygeraniol titers. Another roadblock was the accumulation of an unwanted metabolite that implied inefficient channeling of carbon through the pathway. With the native yeast old yellow enzymes previously shown to use monoterpene intermediates as substrates, both homologs were deleted. These deletions increased 8-hydroxygeraniol yield, resulting in a final *de novo* accumulation of 3.10 mg/L/OD<sub>600</sub> of nepetalactone from simple sugar in microtiter plates. Our pathway optimization will aid in the development of high yielding monoterpene *S. cerevisiae* strains.

Monoterpenes and their indole alkaloid derivatives (MIAs) are plant secondary metabolites known for their pharmaceutical activities<sup>1</sup>. Synthesis of the central MIA scaffold, strictosidine, proceeds via nepetalactol whose oxidized derivative, nepetalactone, is a potent insect repellent with higher repellency than N,N-diethyl-m-toluamide (DEET)<sup>2</sup>. With the growing population of DEET resistant mosquitoes<sup>3</sup>, nepetalactone could be an alternative source of insect repellent if a commercial scale production process is developed. Nepetalactone has higher *in planta* yields than MIAs, yet the mass market demand would preclude plant-sourced nepetalactone for commercial scale production due to prohibitive costs. Elucidation of the strictosidine biosynthetic pathway<sup>4</sup> has enabled *de novo* production of nepetalactol<sup>5</sup> and strictosidine<sup>6</sup> in the budding yeast *S. cerevisiae*. Nepetalactone production was reported in yeast, however this was achieved using an incomplete pathway and supplying pathway intermediates<sup>7</sup>. Based on these initial studies, poor geraniol-8-hydroxylase (G8H) activity and undesired reactions consuming pathway intermediates, by both native and exogenous enzymes, were identified as limiting titers.

The G8H monooxygenase belongs to the cytochrome P450 (CYP) superfamily of hemoproteins. This cytosol-facing, N-terminally bound, endoplasmic reticulum (ER)-localized protein catalyzes the C8-hydroxylation of geraniol, requiring the transfer of two electrons catalyzed by the ER-bound, NADPH-dependent cytochrome P450 reductase (CPR)<sup>8</sup>. Optimization of heterologous CYP activity in yeast can be achieved by selecting or engineering for improved enzyme activity and by optimising CYP and CPR ratios or expression levels<sup>9,10</sup>. The complex relationship between CYP and CPR proteins is further demonstrated by the evolutionary conservation of their interaction domains, where CYP-CPR pairs from different kingdoms can functionally complement, alter or influence enzyme activity<sup>10,11</sup>. Although *S.*

*cerevisiae* expresses a native CPR, heterologous co-expression of a plant CPR frequently results in higher CYP activity<sup>12</sup>.

The synthesis of nepetalactone in *S. cerevisiae* branches from the mevalonate pathway following geranyl pyrophosphate (GPP) dephosphorylation to geraniol by geraniol synthase (GES)<sup>13</sup> (Figure 1). G8H and CPR hydroxylate geraniol to 8-hydroxygeraniol (8HG) followed by oxidation to 8-oxogeraniol, by 8HG oxidoreductase<sup>14</sup>. Iridoid synthase, an NADPH-dependant reductive cyclase, and three nepetalactol-related short-chain reductases (NEPS), subsequently cyclize and oxidize 8-oxogeraniol to nepetalactol and nepetalactone (Figure 1)<sup>15</sup>. In this current study, we report on the optimization of 8HG synthesis in *S. cerevisiae* while reducing off-target reactions in a geraniol producing *S. cerevisiae* strain, leading to *in vivo* production of the insect repellent nepetalactone. We demonstrate that non-cognate CYP-CPR combinations and the ratio of such combinations can modulate 8HG production for increased nepetalactone biosynthesis. Optimization of G8H activity not only leads to increased nepetalactone titers but is also vital in the optimization of an efficient strictosidine pathway in yeast.

## RESULTS AND DISCUSSION

### *In vivo* synthesis of geraniol

*S. cerevisiae* GPP levels are not sufficient for production of detectable amounts of geraniol, hence the modification of the native mevalonate pathway and the expression of exogenous plant derived genes is essential. To increase GPP synthesis, an additional copy of two rate-limiting mevalonate pathway genes were integrated in the genome, a truncated *ScHMGR*

and *ScIDII*<sup>16</sup> along with a mutated *ERG20* (*ERG20*<sup>K197E</sup>) expressed from its native locus<sup>5</sup>. The expression of a

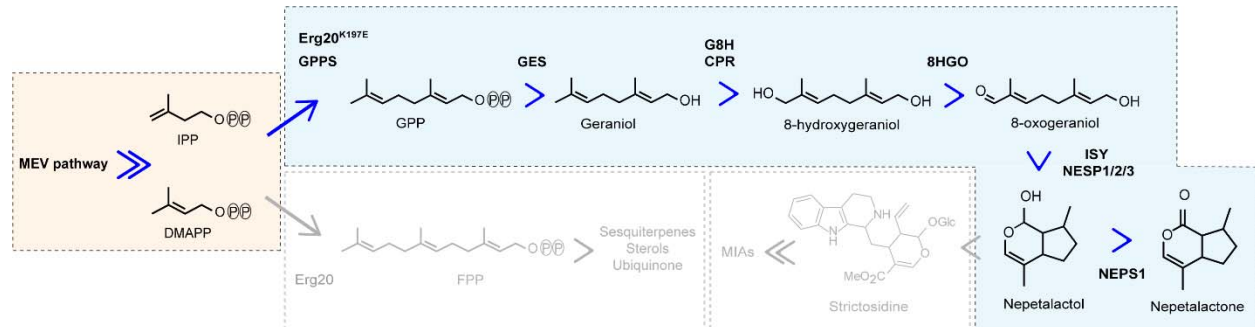

**Figure 1. Overview of nepetalactone biosynthesis in engineered *S. cerevisiae*.** Mevalonate pathway isopentenyl pyrophosphate (IPP) and dimethylallyl pyrophosphate (DMAPP) are condensed by farnesyl pyrophosphate synthase (*ERG20*) and geranyl pyrophosphate synthase (*GPPS*) to form geranyl pyrophosphate (*GPP*). Geraniol synthase (*GES*) then converts *GPP* to geraniol which is then hydroxylated to 8-hydroxygeraniol (*8HG*). The conversion of *8HG* to nepetalactone occurs following oxidation by 8-hydroxygeraniol oxidase (*8HGO*), cyclisation by iridoid synthase (*ISY*) and a combination of three nepetalactol-related short-chain reductases (*NEPS*), and oxidation by *NEPS1*.

geraniol synthase (*ObGES*) and the subsequent removal of the N-terminal plastid targeting peptide<sup>17</sup> resulted in accumulated titers of  $7.22 \pm 0.06$  mg/L/OD<sub>600</sub> of geraniol (Figure S1). The integration of a dedicated *GPP* synthase from *Abies grandis* (*AgGPPS*) further increased geraniol titers by over 2-fold, reaching  $16.18 \pm 0.03$  mg/L/OD<sub>600</sub>. This geraniol-producing strain was used as the starting point for optimizing *8HG* and nepetalactone synthesis.

### Screening of G8H/CPR combinations for optimized 8HG synthesis

Synthesis of *8HG* in *S. cerevisiae* requires optimizing the rate-limiting hydroxylation of geraniol by *G8H*. Using the *CrG8H* amino acid sequence as the search query, a preliminary list

of predicted G8Hs was established based on sequence identity and functional domains (Figure 2A)<sup>18–20</sup>. This library was paired with a CPR collection (Figure 2B) similarly generated using the CPR amino acid sequence from *Papaver somniferum* as the search query (Table S1). The CYPs and CPRs from these libraries were paired combinatorially and analyzed for improved geraniol hydroxylation activity in yeast. The *Catharanthus roseus* G8H remained the most efficient enzyme for C8 geraniol hydroxylation (Figure 2C, Table S2). When paired with *Cr*G8H, several CPRs increased 8HG titers, with *Ns*CPR accumulating  $7.36 \pm 0.97$  mg/L/OD<sub>600</sub>, a 3.3-fold increase in comparison to *Cr*CPR. Furthermore, *Pk*CPR and *Ns*CPR increased the molar conversion of geraniol to 8HG by 48.2 and 48.5%, respectively (Table S3). The range of monoterpene profiles across CYP-CPR pairs in Figure 2C-D may be explained by variations in coupling efficiencies, potentially influenced by the transmembrane domain and membrane lipid composition<sup>21</sup>. When paired with the *Cr*G8H, several non-cognate CPRs may have increased coupling efficiencies thereby increasing substrate turnover and 8HG titers.

Seven out of the 122 CYP-CPR combinations tested showed >2-fold increases in geraniol titers (Figure 2D, Table S4). *Ha*G8H, for example, increased geraniol accumulation to  $17.38 \pm 1.80$  mg/L/OD<sub>600</sub> when paired with *Vv*CPR, with no observed 8HG accumulation, which could indicate geraniol synthase activity<sup>22</sup>. Analysis using the ExPASy ScanProsite tool<sup>23</sup> identified the highly conserved terpene synthase Mg<sup>2+</sup> binding motif (DDxx(D/E))<sup>24</sup> in the *Ha*G8H variant, possibly explaining the increase in geraniol accumulation. When compared to the parent geraniol-producing strain, several CYP-CPR combinations resulted in decreased geraniol titers, as expected, but without a corresponding increase in 8HG (Figure 2C and 2D) potentially suggesting the conversion of geraniol to unidentified, non-productive products<sup>25,26</sup>. Nonetheless, the

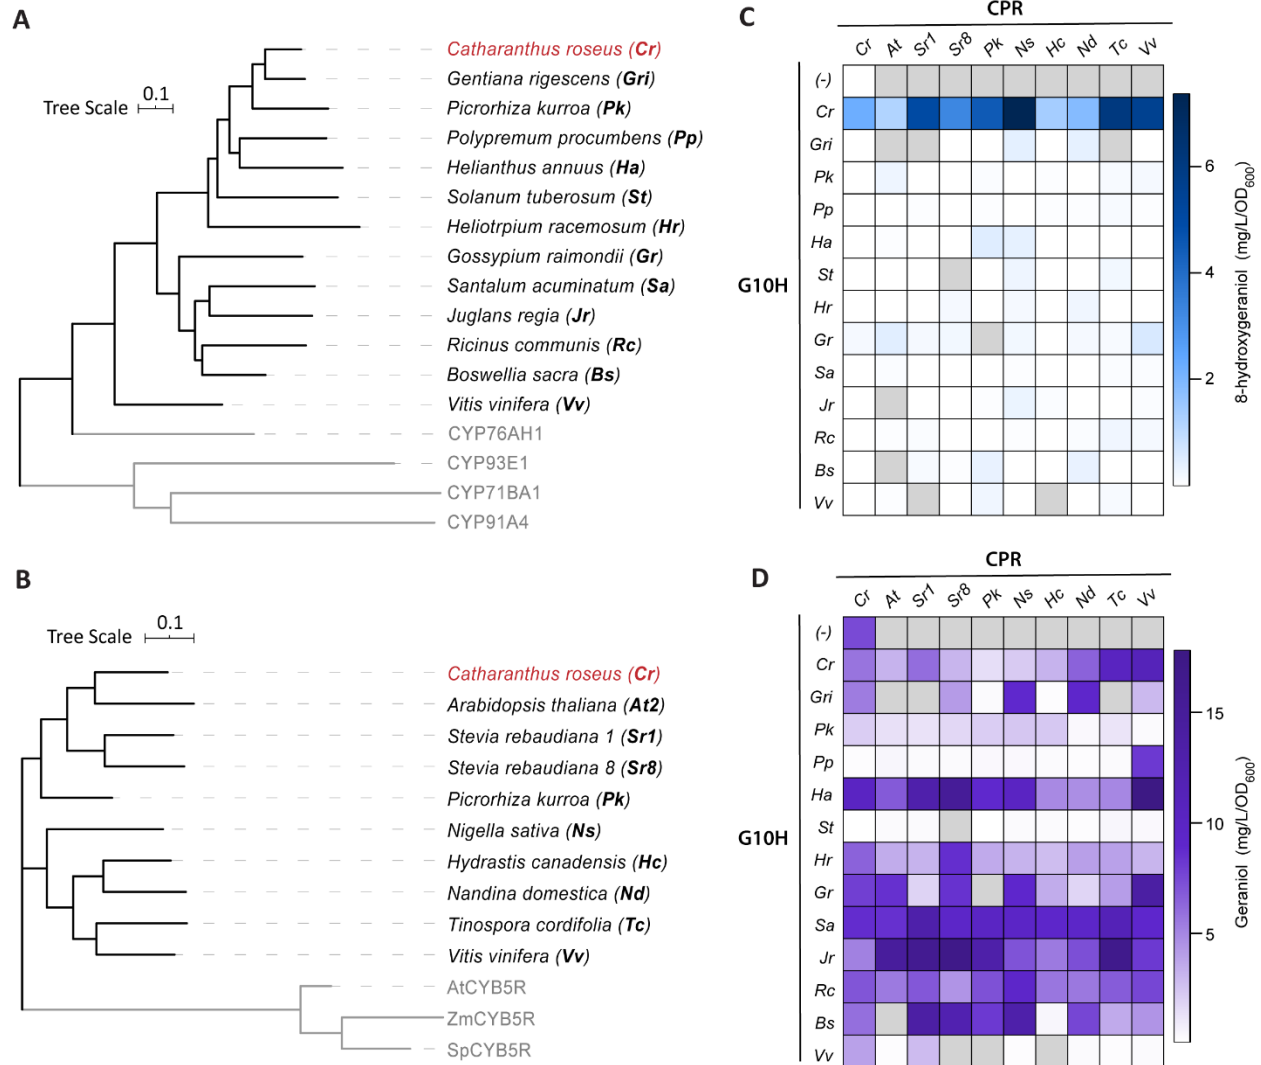

**Figure 2. Analysis of CYP-CPR pairs on monoterpene production. A.** Bootstrapped maximum likelihood phylogenetic tree of predicted G8Hs, rooted using outgroups (grey). **B.** Bootstrapped maximum likelihood phylogenetic tree of the CPR library rooted by cytochrome b5 reductase (CYB5R) outgroups (grey). **C.** 8HG and **D.** Geraniol synthesis from CYP-CPR combinations measured by GC-MS after 48 hours (Table S2 and S4).  $n = 3$ . Grey squares represent CYP-CPR pairs that could not be successfully constructed.

identification of several CPRs that improve CYP-catalyzed 8HG synthesis provides a baseline for further optimizations.

## Optimization of CrG8H-CPR expression ratio

As CYP:CPR ratios can influence substrate turnover and therefore metabolite accumulation<sup>27</sup>, we iteratively integrated multiple copies of *CrG8H* into a strain with *CrCPR* to determine the optimal ratio for 8HG production. As the CYP:CPR ratio was increased so were 8HG levels, up to  $10.46 \pm 2.27$  mg/L/OD<sub>600</sub> with three copies of *CrG8H*, an 88% molar conversion of geraniol (Figure 3A, Table S5). Addition of a single *CrG8H* copy increased cell growth, potentially by reducing levels of geraniol, as it is known to permeabilize the cell membrane<sup>28</sup>. Yet, expressing two or three *CrG8H* copies reduced growth, which may have been a result of ER disruption by the overexpression of heterologous membrane-bound proteins (Figure 3A)<sup>29</sup>.

We next tested the translatability of our higher 8HG titers, resulting from a 3:1 *CrG8H* to *CrCPR* ratio, using four of the CPRs that were identified to increase 8HG production or molar conversion (Figure 2C). When expressed along with 3x-*CrG8H*, *NsCPR* accumulated a slightly higher 8HG titer ( $p > 0.05$ ) of  $14.75 \pm 0.77$  mg/L/OD<sub>600</sub> when compared to  $12.71 \pm 1.11$  mg/L/OD<sub>600</sub> for *CrCPR* (Figure 3B). However, this trend was not consistent with the remaining three CPRs, reinforcing the requirement for optimal CYP:CPR ratios for enzyme pairs, as several CPRs outperformed *CrCPR* in the 1x-*CrG8H* strain but not in the 3x-*CrG8H* strain. *NsCPR* could be a potential candidate for improving 8HG biosynthesis, however the low growth observed at both 48 and 72h influences total accumulation of 8HG and therefore requires further optimisation for its use as an alternative to *CrCPR*. High-throughput combinatorial multiplexed integration of multiple G8H and CPR could serve as a tool to optimise CYP:CPR ratios, as previously described for butanediol synthesis in *S. cerevisiae* from xylose<sup>30</sup>.



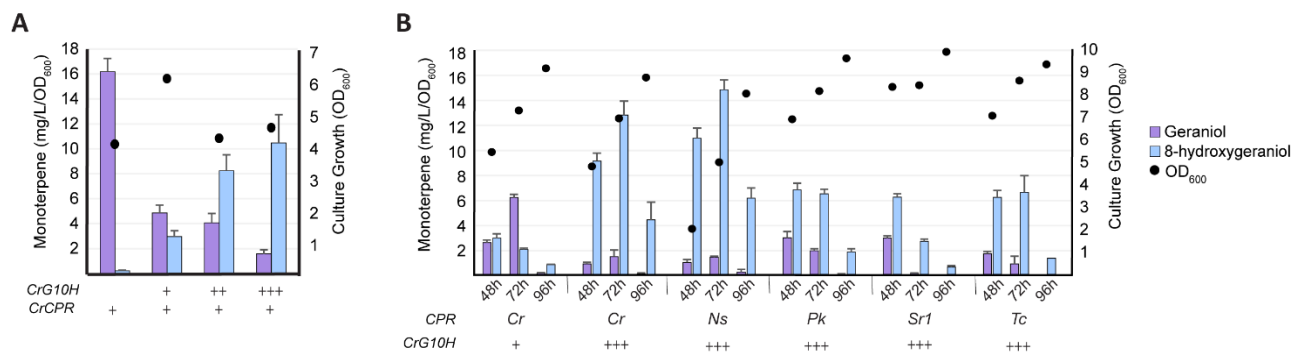

**Figure 3. Monoterpene production from CYP-CPR optimization. A.** Monoterpene concentrations and cell growth measured by GC-MS after 48 hours in a geraniol-producing strain expressing a single copy of *CrCPR* with one, two or three copies of *CrG8H*.  $n = 3$ . **B.** Monoterpene production and growth of geraniol-producing strains expressing three copies of *CrG8H* together with various CPRs measured by GC-MS after 48, 72 and 96 hours.  $n = 3$ . Error bars indicate standard deviation.

### Eliminating non-productive pathway intermediates

Optimal 8HG production in *S. cerevisiae* requires mitigating off-target products that sequester carbon away from its biosynthesis. Increasing 8HG titers correlated with an increase in an off-target metabolite predicted to be isopulegol by the NIST08 MS database (Figure 4A, peak 3)<sup>31</sup>. Subsequent comparison of the shunt product spectra to that of an authentic isopulegol standard revealed different retention times and mass spectra between isopulegol and the unidentified peak (Figure S2) indicating that the shunt product was not isopulegol. Further experimentation, including NMR, would be needed to determine the identity of this product. To mitigate shunt product formation, the yeast NADPH oxidoreductases, old yellow enzymes Oye2 and Oye3, were deleted from the *CrG8H* expressing strain<sup>32,33</sup>. Deletion of *OYE3* increased both 8HG and the shunt product peak by 2- and 4- fold, respectively (Figure 4B), suggesting Oye3 catalyzes the synthesis of non-productive terpene metabolites, but not the identified shunt

product. Deletion of both *OYE2* and *OYE3* eliminated the production of the shunt product resulting in 3- and 8.5-fold increase in 8HG in the strains expressing one or three copies of *CrG8H*, respectively.

To test if 8HG is the precursor in the synthesis of the shunt product, cultures of wild-type *S. cerevisiae* were supplemented with 8HG and analyzed for the appearance of the off-target peak (Figure 4C). The observed accumulation of the shunt product suggests 8HG is the precursor metabolite and that the reaction(s) required for its conversion is catalyzed by a native yeast enzyme(s). In addition, this off-target peak was only observed from cultures in which the geraniol-producing strain was expressing the *CrG8H* (Figure S3), providing further evidence for 8HG as the precursor.

Following the mitigation of non-productive reactions, we tested whether changes to media composition could increase cell productivity. The strain expressing three copies of *CrG8H* was grown in YPD, 1xSC, 2xSC and 2xSC with 2% glucose and 8HG accumulation was assessed. When grown in 1xSC, 8HG titers increased by 6.9-fold when compared to YPD, reaching  $72.52 \pm 17.27$  mg/L/OD<sub>600</sub> (Figure 4D), the remaining media compositions did not affect titers (data not shown). The difference in 8HG accumulation between YPD and SC may be due to the presence of yeast extract in YPD, potentially providing end-product metabolites that could regulate biochemical pathways. With the mitigation of non-productive reductions and the identification of a more optimal growth media for increasing productivity, the remainder of the pathway for nepetalactone biosynthesis was integrated into this 8HG-producing strain.

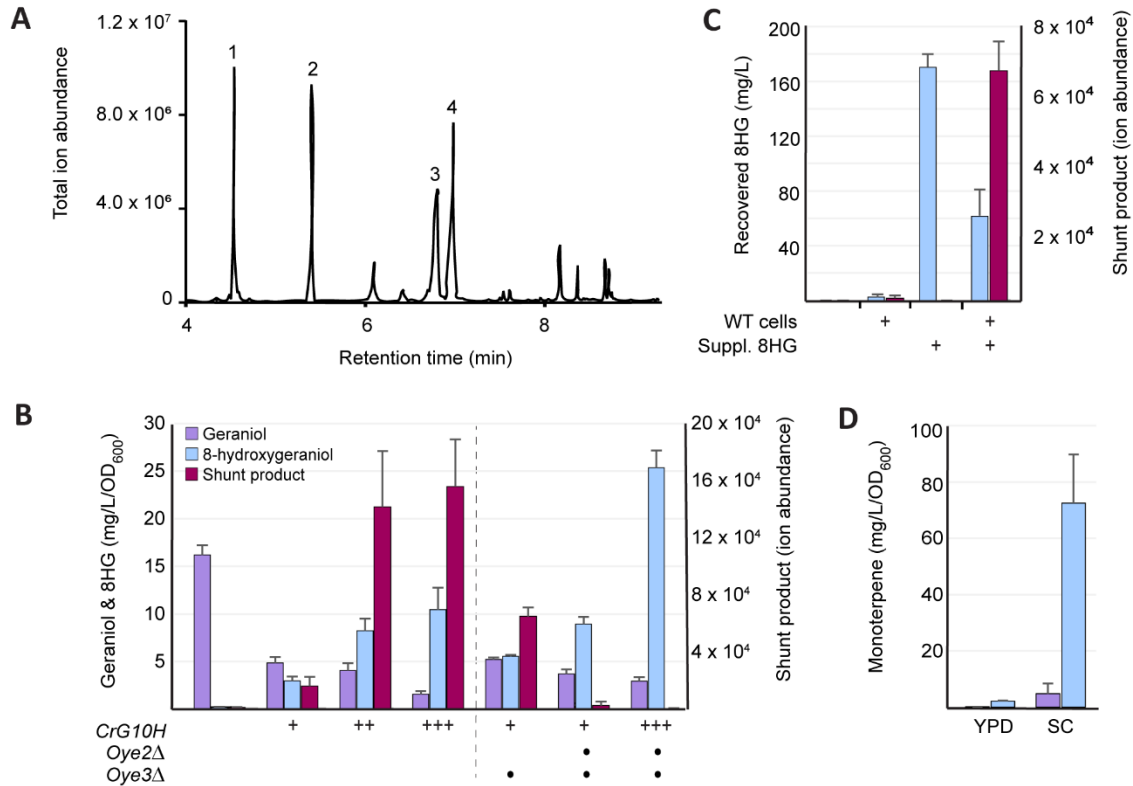

**Figure 4. Elimination of unknown monoterpene shunt product.** **A.** GC-MS total ion abundance chromatograms for extracts of the 3x-*CrG8H* strain culture broths. Peak identification using analytic standards are as follows: **1.** Geraniol; **2.** Eugenol (internal standard); **3.** Unknown **4.** 8HG. Remaining peaks are yeast metabolites present in the wild-type control. **B.** Monoterpene titers in the *CrG8H* background strains with *OYE2* and *OYE3* deletions. Due to the lack of an appropriate standard, the shunt product is reported as area under the curve.  $n = 3$ . **C.** Monoterpene titers following supplementation of 8HG to wild-type *S. cerevisiae* culture broth.  $n = 3$ . **D.** Monoterpene titers from the strain expressing 3x-*CrG8H* grown in YPD or SC media.  $n = 4$ . Error bars indicate standard deviation.

### Production of nepetalactone

Several additional enzymes are required to achieve *de novo* biosynthesis of nepetalactone in *S. cerevisiae*. First, 8HG is oxidized by 8HGO to 8-oxogeraniol, which is subsequently

cyclized by ISY, to produce nepetalactol (Figure 5A). In the *Nepeta* plant species, ISY works with three NEPS for the cyclisation of 8-oxogeraniol to nepetalactol, determining the stereochemistry of the bridgehead 4a-7a-carbons<sup>34</sup> (Figure 5A). ISY catalyses the initial reduction of 8-oxogeraniol to the activated oxocitronellyl enol intermediate enabling spontaneous cyclisation to (4a*S*,7*S*,7a*R*)-nepetalactol. NEPS1 and NEPS2 stabilize the enol intermediate thereby reducing off-target iridodial products<sup>34</sup>. Subsequent oxidation by NEPS1 is responsible for the conversion of nepetalactol to their cognate nepetalactone isomers<sup>34</sup>. The genes for these remaining enzymes were sequentially integrated into the strain harboring 3x-*CrG8H*. The *OYE2* and *OYE3* genes were then iteratively deleted from each strain to assess their effect on nepetalactone synthesis (Figure 5B).

Following the introduction of *Cr8HGO* and *ISY* into the 3x-*CrG8H* strain, nepetalactol accumulation reached  $0.33 \pm 0.05$  mg/L/OD<sub>600</sub> with titers increasing to  $2.54 \pm 0.06$  mg/L/OD<sub>600</sub> following the deletion of both *OYE2* and *OYE3* (Figure 5B). Subsequent integration of *NEPS1*, resulted in trace amounts of nepetalactone ( $0.19 \pm 0.01$  mg/L/OD<sub>600</sub>) while the integration of *NEPS2* alone, following *ISY* integration, did not produce any measurable nepetalactone (Figure 5B). Since *NEPS2* is not directly involved in nepetalactone synthesis, this result is in agreement with its reported activity<sup>15</sup>. However, nepetalactol titers decreased to  $1.11 \pm 0.1$  mg/L/OD<sub>600</sub> upon *NEPS2* integration compared to the strain with only *ISY* (Figure 5C). This may suggest that without *NEPS1*, some reactive enol intermediate is lost to non-productive reactions. The integration of both *NEPS1* and *NEPS2* into the *ISY* strain resulted in the highest titers of both nepetalactol and nepetalactone, accumulating  $4.22 \pm 0.79$  mg/L/OD<sub>600</sub> and  $3.19 \pm 0.66$  mg/L/OD<sub>600</sub>, respectively. This is a notable increase in titers compared to the same strain with *OYE2* and *OYE3*, where accumulation of nepetalactol and nepetalactone only reached  $0.19 \pm$

0.02 mg/L/OD<sub>600</sub> and 0.12 ± 0.01 mg/L/OD<sub>600</sub>, respectively. These results suggest that both NEPS1 and NEPS2 are required for efficient nepetalactone production and deletion of the *OYE* homologs are necessary for increasing titers.

This system presents the first *de novo* nepetalactone production in *S. cerevisiae* and lays the foundation for future optimization strategies aimed at increasing total biosynthesis of nepetalactone from glucose, thereby providing an opportunity to produce a plant-derived alternative insect repellent at industrial scale.

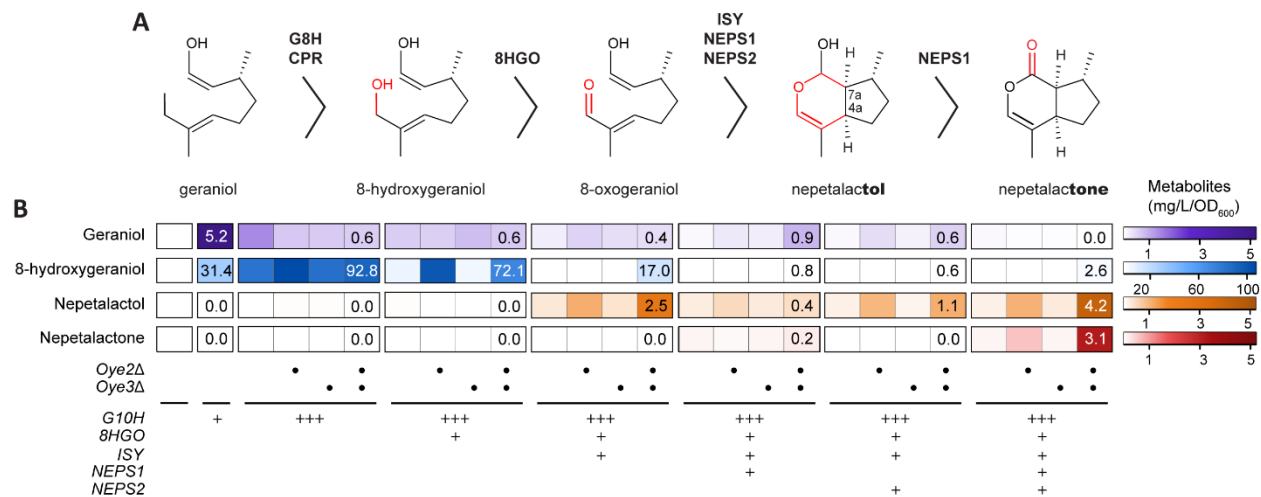

**Figure 5. *De novo* synthesis of nepetalactone in *S. cerevisiae*.** **A.** Enzymatic conversion of geraniol to nepetalactone. **B.** Monoterpene and iridoid synthesis from glucose following the integration of *Cr8HGO*, *ISY*, *NEPS1*, *NEPS2* and deletion of *OYE2* and *OYE3*. Titrers were analyzed by Q-TOF LC-MS after 72 hours. *n* = 4.

## MATERIALS AND METHODS

### Strains, media and DNA manipulation

*S. cerevisiae* strains used in this study are listed in Table S6. Yeast cultures were grown in YPD (10 g/L yeast extract, 20 g/L tryptone, 20 g/L dextrose) or synthetic complete (SC)

medium (6.8 g/L Yeast Nitrogen Base (YNB), amino acids, 2% (w/v) glucose) and supplemented with 100µg/ml geneticin (G418) to select for the ERG20<sup>K197E</sup> background. When appropriate, 200 µg/ml of hygromycin was added for the selection of the pCas plasmid. Plasmids were maintained and propagated in *Escherichia coli* DH5α. *E. coli* cultures were incubated at 37°C with shaking at 200 rpm in Lysogeny Broth (LB) supplemented with either 100 µg/mL of ampicillin or 100 µg/mL of hygromycin.

Genes and primers used in this study are described in Tables S1 and S7, respectively. Promoters, terminators, and the yeast mevalonate pathway genes were amplified by PCR from *S. cerevisiae* CEN.PK genomic DNA. Genes originating from plant species, apart from the G8H variant library, were amplified from pYES2-GerOH<sup>5</sup>. The pCas plasmid was purchased from (Addgene plasmid #60847) and modified to express the hphNT1 cassette to confer hygromycin resistance. Genes encoding G8H enzymes were codon optimized and synthesized by GeneArt or Twist Bioscience. The *G8H* genes were further sub-cloned individually into pJet2.1 using the CloneJET PCR cloning kit. The integrative plasmids used to introduce the genes for nepetalactone synthesis - *8HGO*, *ISY*, *NEPS1* and *NEPS2* - were constructed using Golden Gate assembly<sup>35</sup> with components from the Yeast Toolkit<sup>36</sup>. Plasmids were purified from *E. coli* stocks using the GeneJET plasmid miniprep kit where the DNA parts were amplified by PCR using Phusion High-Fidelity DNA polymerase, resolved using 0.8% (w/v) agarose gel electrophoresis and individually purified using Qiagen Gel Purification kit.

### **Library construction and phylogenetic analysis**

The G8H sequence library was assembled using the *CrG8H* amino acid sequence as the search query for three separate databases: Plant Metabolic Network<sup>18</sup>, 1k Plant Collection<sup>20</sup> and NCBI using DeltaBLAST<sup>19</sup>. From each database, sequences with over 65% homology were

selected. This list was consolidated using CD-HIT<sup>37</sup> with a sequence identity cut-off of 90%. Bootstrapped (500 replicates) maximum likelihood phylogenetic trees for the G8H and CPR libraries were built following MUSCLE alignment using MEGA7<sup>38</sup>. The phylogenetic trees were rooted using the various outgroups; amino acid sequences can be found in Table S1.

### **Yeast transformation and CRISPR/Cas9-mediated genome integration**

*S. cerevisiae* was transformed using a method modified from the Gietz PEG/LiAc protocol<sup>39</sup>. Strains were initially grown overnight in YPD G418 medium to maintain selection of the *Erg20*<sup>K197E</sup> mutant. After cells were harvested and washed, the cell pellet was suspended in 3M lithium acetate (5.6  $\mu$ L per transformation) with DNA and water to a total volume of 40  $\mu$ L. The competent cells were incubated at room temperature for 10 minutes before adding the transformation mix and completing the rest of the protocol. All genomic integrations (Table S8) were performed using the CRISPR-Cas9 delivery system<sup>40</sup>. Between 1 and 3  $\mu$ g of donor DNA were used for CRISPR Cas9-mediated integration.

### **Analysis of monoterpenes and iridoids**

Monoterpenes were analyzed by either GC-MS or Q-TOF LC-MS. Strains were inoculated in a 96-well deep well plate containing 500  $\mu$ L of YPD or SC with G418 and incubated at 30°C and 200 rpm for either 48, 72 or 96 hours. For GC-MS sample preparation, 400  $\mu$ L culture aliquots were extracted into 200  $\mu$ L of ethyl acetate containing eugenol as an internal standard. Extracts were analyzed on an Agilent 6890N GC coupled to an Agilent 5875C mass selective detector. An HP-5ms column (30 m  $\times$  0.25 mm  $\times$  0.25  $\mu$ m film thickness) was used with a 1  $\mu$ L splitless injection, hydrogen gas as the carrier with a constant flow of 1.3

mL/min and an inlet temperature of 240°C. The initial oven temperature was set to 60°C for 2 minutes, followed by an increase to 150°C at 30°C/min to, 10°C/min to 220°C and 30°C/min to 325°C (5 min hold). Total ion chromatograms were recorded between  $m/z$  50–220. For LC-MS, 400  $\mu$ L culture aliquots were extracted into 400  $\mu$ L of 100% methanol. Samples were analyzed using the 1290 Infinity II LC system coupled to a 6560 Ion Mobility Q-TOF (Agilent Technologies). Samples were analyzed with a Zorbax Eclipse Plus C18 50  $\times$  4.6 mm column (Agilent Technologies) using a gradient of solvent A (100% water, 0.1% formic acid) and solvent B (100% acetonitrile, 0.1% formic acid) to separate metabolites. Metabolites were separated using a linear gradient: 0–5 min 95% A/5% B, 5– 6 min 40% A/60% B at a flow rate of 0.3 mL/min, 6-7 min 5% A/95% B at a flow rate of 0.45 mL/min followed by a 2 min equilibration at 95% A/5% B at a flow rate of 0.4 mL/min. The system was operated in positive electrospray mode using a capillary voltage 4000 V, fragmentor voltage 400 V, source temperature 325 °C, nebulizer pressure 55 psi and, gas flow 10 L/ min. Citronellol, geraniol, eugenol (Sigma Aldrich), 8HG, nepetalactol and nepetalactone (Toronto Research Chemicals Ins.) standards were used to determine retention times and calibration curves for comparison with samples (Figure S4). Isopulegol was identified using the NIST 08 standard reference database<sup>31</sup>.

## ACKNOWLEDGEMENTS

We thank Yves Gelinat for the use of his GC-MS. This study was financially supported by a NSERC Discovery grant. M.E.D. was supported by the Faculty of Arts and Science Graduate fellowship from Concordia University and D.T. was supported by the SynBioApps NSERC-CREATE training program and V.J.J.M. is supported by a Concordia University Research Chair.



## **AUTHOR CONTRIBUTIONS**

M.E.D and V.J.J.M. designed the research. M.E.D., and D.T. performed the experiments. V.J.J.M supervised the research. M.E.D. wrote the manuscript with editing help from D.T. and V.J.J.M.

## **COMPETING FINANCIAL INTERESTS**

The authors declare no competing financial interests.

## **ADDITIONAL INFORMATION**

Supplementary information is available in the online version of the paper. Correspondence and requests for materials should be addressed to V.J.J.M.

## **DATA AVAILABILITY**

The data that support the findings of this study are available from the authors upon reasonable request.

1. Wang, G., Tang, W. & Bidigare, R. R. Terpenoids as Therapeutic Drugs and Pharmaceutical Agents. in *Natural Products* (eds. Zhang, L. & Demain, A. L.) 197–227 (Humana Press, 2005). doi:10.1007/978-1-59259-976-9\_9.

2. Bernier, U. R., Furman, K. D., Kline, D. L., Allan, S. A. & Barnard, D. R. Comparison of Contact and Spatial Repellency of Catnip Oil and N,N-Diethyl-3-methylbenzamide (Deet) Against Mosquitoes. *J. Med. Entomol.* **42**, 306–311 (2005).
3. Stanczyk, N. M., Brookfield, J. F. Y., Ignell, R., Logan, J. G. & Field, L. M. Behavioral insensitivity to DEET in *Aedes aegypti* is a genetically determined trait residing in changes in sensillum function. *Proc. Natl. Acad. Sci. U. S. A.* **107**, 8575–8580 (2010).
4. De Luca, V., Salim, V., Levac, D., Atsumi, S. M. & Yu, F. Discovery and Functional Analysis of Monoterpenoid Indole Alkaloid Pathways in Plants. in *Methods in Enzymology* vol. 515 207–229 (Academic Press, 2012).
5. Campbell, A. *et al.* Engineering of a Nepetalactol-Producing Platform Strain of *Saccharomyces cerevisiae* for the Production of Plant Seco-Iridoids. *ACS Synth. Biol.* **5**, 405–414 (2016).
6. Brown, S., Clastre, M., Courdavault, V. & O'Connor, S. E. De novo production of the plant-derived alkaloid strictosidine in yeast. *Proc. Natl. Acad. Sci.* **112**, 3205–3210 (2015).
7. Billingsley, J. M., Anguiano, J. L. & Tang, Y. Production of semi-biosynthetic nepetalactone in yeast. *J. Ind. Microbiol. Biotechnol.* **46**, 1365–1370 (2019).
8. Meunier, B., de Visser, S. P. & Shaik, S. Mechanism of Oxidation Reactions Catalyzed by Cytochrome P450 Enzymes. *Chem. Rev.* **104**, 3947–3980 (2004).
9. Narcross, L., Bourgeois, L., Fossati, E., Burton, E. & Martin, V. J. J. Mining Enzyme Diversity of Transcriptome Libraries through DNA Synthesis for Benzylisoquinoline Alkaloid Pathway Optimization in Yeast. *ACS Synth. Biol.* **5**, 1505–1518 (2016).
10. Gold, N. D. *et al.* A Combinatorial Approach To Study Cytochrome P450 Enzymes for *De Novo* Production of Steviol Glucosides in Baker's Yeast. *ACS Synth. Biol.* **7**, 2918–2929

- (2018).
11. Jensen, K. & Møller, B. L. Plant NADPH-cytochrome P450 oxidoreductases. *Phytochemistry* **71**, 132–141 (2010).
  12. Eberle, D., Ullmann, P., Werck-Reichhart, D. & Petersen, M. cDNA cloning and functional characterisation of CYP98A14 and NADPH:cytochrome P450 reductase from *Coleus blumei* involved in rosmarinic acid biosynthesis. *Plant Mol. Biol.* **69**, 239–253 (2009).
  13. Iijima, Y., Gang, D. R., Fridman, E., Lewinsohn, E. & Pichersky, E. Characterization of Geraniol Synthase from the Peltate Glands of Sweet Basil. *Plant Physiol.* **134**, 370–379 (2004).
  14. Krithika, R. *et al.* Characterization of 10-Hydroxygeraniol Dehydrogenase from *Catharanthus roseus* Reveals Cascaded Enzymatic Activity in Iridoid Biosynthesis. *Sci. Rep.* **5**, 8258 (2015).
  15. Lichman, B. R. *et al.* Uncoupled activation and cyclization in catmint reductive terpenoid biosynthesis. *Nat. Chem. Biol.* **15**, 71–79 (2019).
  16. Liu, J., Zhang, W., Du, G., Chen, J. & Zhou, J. Overproduction of geraniol by enhanced precursor supply in *Saccharomyces cerevisiae*. *J. Biotechnol.* **168**, 446–451 (2013).
  17. Zhao, J., Bao, X., Li, C., Shen, Y. & Hou, J. Improving monoterpene geraniol production through geranyl diphosphate synthesis regulation in *Saccharomyces cerevisiae*. *Appl. Microbiol. Biotechnol.* **100**, 4561–4571 (2016).
  18. Schläpfer, P. *et al.* Genome-Wide Prediction of Metabolic Enzymes, Pathways, and Gene Clusters in Plants. *Plant Physiol.* **173**, 2041–2059 (2017).
  19. Boratyn, G. M. *et al.* Domain enhanced lookup time accelerated BLAST. *Biol. Direct* **7**, 12 (2012).

20. Matasci, N. *et al.* Data access for the 1,000 Plants (1KP) project. *GigaScience* **3**, 17 (2014).
21. Barnaba, C., Gentry, K., Sumangala, N. & Ramamoorthy, A. The catalytic function of cytochrome P450 is entwined with its membrane-bound nature. *F1000Research* **6**, 662 (2017).
22. Zhao, B. *et al.* Crystal structure of albaflavenone monooxygenase containing a moonlighting terpene synthase active site. *J. Biol. Chem.* **284**, 36711–36719 (2009).
23. Sigrist, C. J. A. *et al.* New and continuing developments at PROSITE. *Nucleic Acids Res.* **41**, D344–D347 (2012).
24. Jia, Q. Computational Identification of Terpene Synthase Genes and Their Evolutionary Analysis. (University of Tennessee, 2016).
25. Guengerich, F. P. & Munro, A. W. Unusual Cytochrome P450 Enzymes and Reactions. *J. Biol. Chem.* **288**, 17065–17073 (2013).
26. Liu, Q. *et al.* Kauniolide synthase is a P450 with unusual hydroxylation and cyclization-elimination activity. *Nat. Commun.* **9**, 4657 (2018).
27. Walters Biggs, B. *et al.* Overcoming heterologous protein interdependency to optimize P450-mediated Taxol precursor synthesis in *Escherichia coli*. *Proc. Natl. Acad. Sci.* **113**, 3209–3214 (2016).
28. Bard, M., Albrecht, M. R., Gupta, N., Guynn, C. J. & Stillwell, W. Geraniol interferes with membrane functions in strains of *Candida* and *Saccharomyces*. *Lipids* **23**, 534–538 (1988).
29. Osterberg, M. *et al.* Phenotypic effects of membrane protein overexpression in *Saccharomyces cerevisiae*. *Proc. Natl. Acad. Sci.* **103**, 11148–11153 (2006).
30. Shi, S., Liang, Y., Zhang, M. M., Ang, E. L. & Zhao, H. A highly efficient single-step, markerless strategy for multi-copy chromosomal integration of large biochemical pathways

- in *Saccharomyces cerevisiae*. *Metab. Eng.* **33**, 19–27 (2016).
31. NIST Standard Reference Database Number 173. in *NIST Standard Reference Simulation Website* (ed. Shen, V.K., Siderius, D.W., Krekelberg, W.P., and Hatch, H. W.) 20899 (National Institute of Standards and Technology). doi:<http://doi.org/10.18434/T4M88Q>.
  32. Steyer, D. *et al.* Genetic analysis of geraniol metabolism during fermentation. *Food Microbiol.* **33**, 228–234 (2013).
  33. Billingsley, J. M. *et al.* Engineering the biocatalytic selectivity of iridoid production in *Saccharomyces cerevisiae*. *Metab. Eng.* **44**, 117–125 (2017).
  34. Lichman, B. R. *et al.* Uncoupled activation and cyclization in catmint reductive terpenoid biosynthesis. *Nat. Chem. Biol.* **15**, 71–79 (2019).
  35. Engler, C., Kandzia, R. & Marillonnet, S. A one pot, one step, precision cloning method with high throughput capability. *PloS One* **3**, e3647 (2008).
  36. Lee, M. E., DeLoache, W. C., Cervantes, B. & Dueber, J. E. A Highly Characterized Yeast Toolkit for Modular, Multipart Assembly. *ACS Synth. Biol.* **4**, 975–986 (2015).
  37. Huang, Y., Niu, B., Gao, Y., Fu, L. & Li, W. CD-HIT Suite: a web server for clustering and comparing biological sequences. *Bioinformatics* **26**, 680–682 (2010).
  38. Kumar, S., Stecher, G. & Tamura, K. MEGA7: Molecular Evolutionary Genetics Analysis Version 7.0 for Bigger Datasets. *Mol. Biol. Evol.* **33**, 1870–1874 (2016).
  39. Gietz, R. D. & Schiestl, R. H. High-efficiency yeast transformation using the LiAc/SS carrier DNA/PEG method. *Nat. Protoc.* **2**, 31–4 (2007).
  40. Ryan, O. W. *et al.* Selection of chromosomal DNA libraries using a multiplex CRISPR system. *eLife* **3**, (2014).
